# Supplementary material
Source: publisher figshare collection journal article supplement (https://springernature.figshare.com/ndownloader/files/22205484)
Supplement: Supplementary file 1 [file 22205484]

Measurement(s),mineral
Technology Type(s),hyperspectral imagery • chemical imaging
Factor Type(s),wavelength
